# Supplementary material for: Sustained in vivo signaling by long-lived IL-2 induces prolonged increases of regulatory T cells
Source: PubMed Central journal article supplement (PMC4298360; doi:10.1016/j.jaut.2014.10.002), 2015-01
Supplement: mmc1.pdf [file mmc1.pdf]

**SUPPLEMENTARY FIGURE 1**

**A**

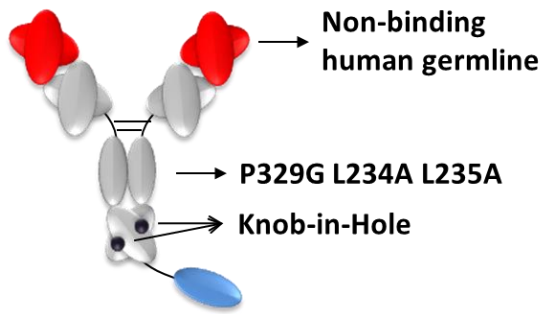

**IgG-IL-2**

**B**

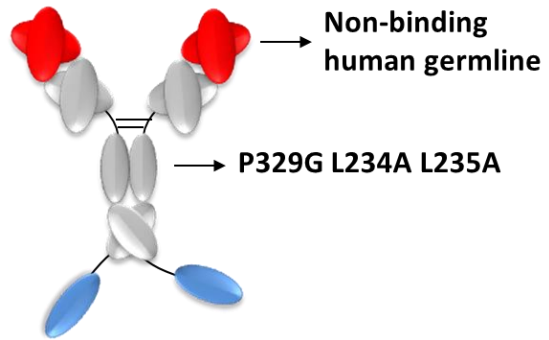

**IgG-(IL-2)<sub>2</sub>**

**C**

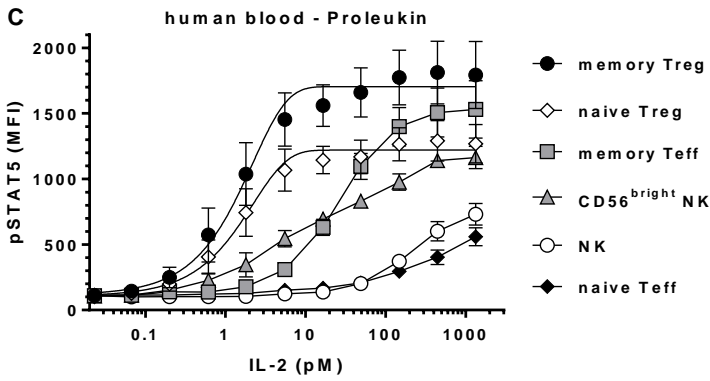

**D**

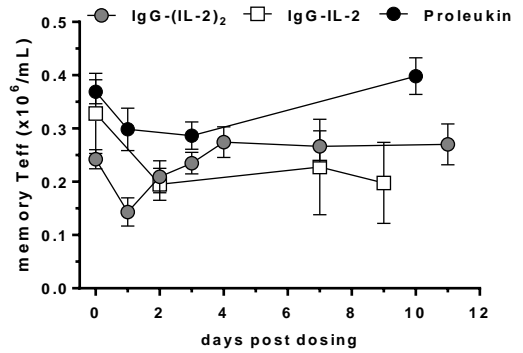

**E**

|           | Cynomolgus dose<br>pmoles/kg (IU/kg) | Human equivalent dose<br>(IU/m <sup>2</sup> ) |
|-----------|--------------------------------------|-----------------------------------------------|
| Proleukin | 40 (10,000)                          | 120,000                                       |
|           | 120 (30,000)                         | 360,000                                       |
|           | 400 (100,000)                        | 1,200,000                                     |
|           | 800 (200,000)                        | 4,500,000*                                    |
