# Supplementary material for: Sustained in vivo signaling by long-lived IL-2 induces prolonged increases of regulatory T cells
Source: PubMed Central journal article supplement (PMC4298360; doi:10.1016/j.jaut.2014.10.002), 2015-01
Supplement: mmc3.pdf [file mmc3.pdf]

### SUPPLEMENTARY FIGURE 3

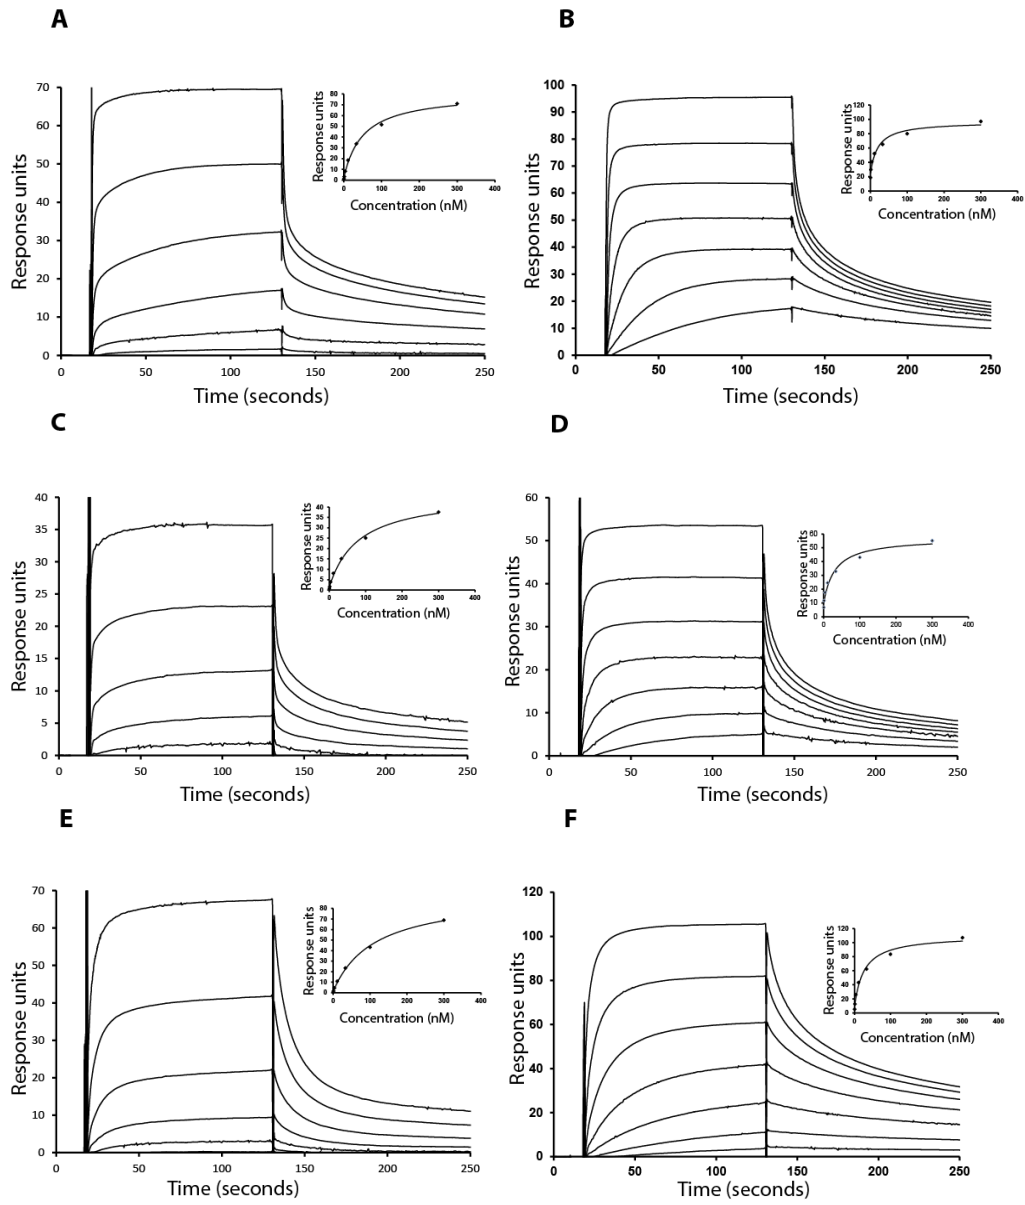

| Construct               | IL-2R $\alpha$ | $K_D$ steady state (nM) |
|-------------------------|----------------|-------------------------|
| IgG-IL-2                | human          | 15                      |
|                         | cynomolgus     | 30                      |
|                         | murine         | 110                     |
| IgG-(IL-2) <sub>2</sub> | human          | 5                       |
|                         | cynomolgus     | 15                      |
|                         | murine         | 30                      |
