# Supplementary material for: Sustained in vivo signaling by long-lived IL-2 induces prolonged increases of regulatory T cells
Source: PubMed Central journal article supplement (PMC4298360; doi:10.1016/j.jaut.2014.10.002), 2015-01

# SUPPLEMENTARY FIGURE 8

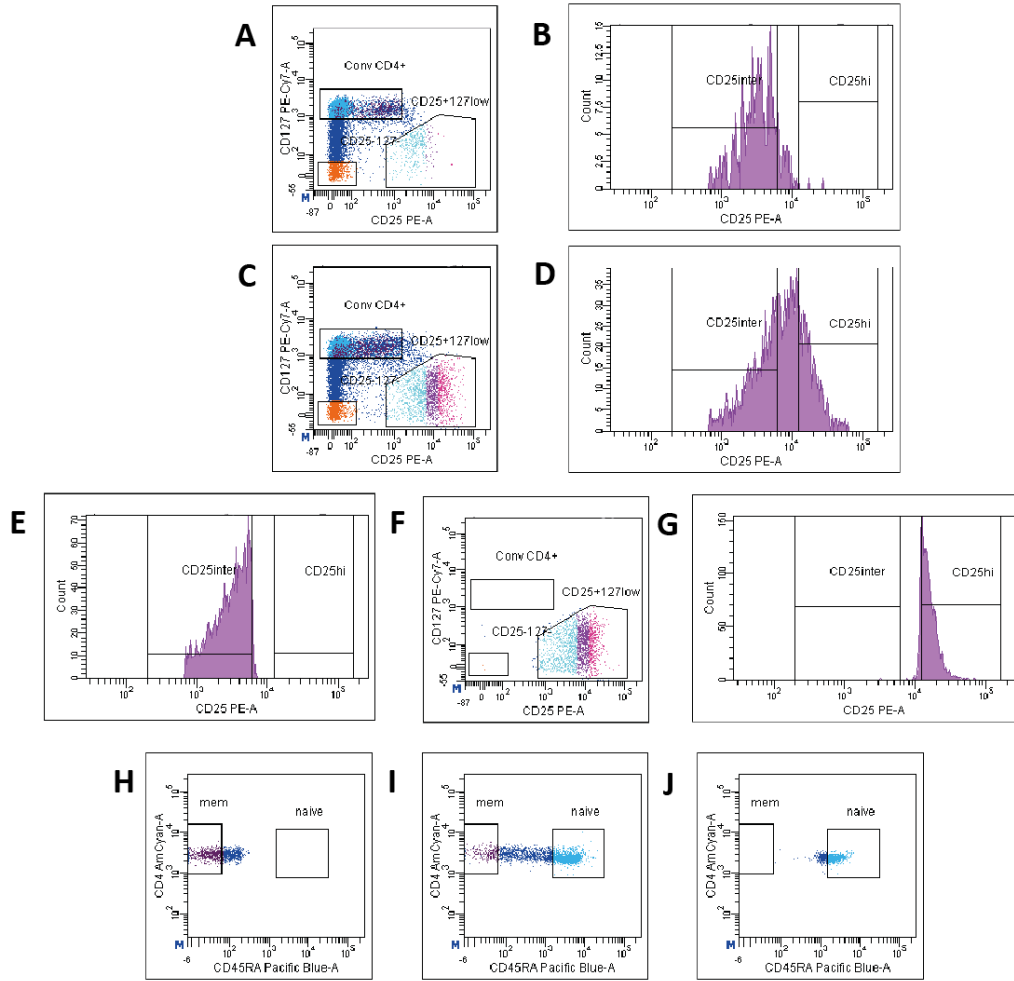

Supplement: mmc8.pdf [file mmc8.pdf]
